# Supplementary material for: Prospective associations of poor diet quality with long-term incidence of protein-energy malnutrition in community-dwelling older adults: the Health, Aging, and Body Composition (Health ABC) Study
Source: PubMed Central journal article supplement — Am J Clin Nutr. 2018 Feb 26;107(2):155–64. doi: 10.1093/ajcn/nqx020 (PMC6248415; doi:10.1093/ajcn/nqx020), 2018-02-26
Supplement: nqx020_supp.pdf [file nqx020_supp.pdf]

## Online Supporting Material

**Supplemental Table 1.** Hazard ratios and 95% confidence intervals<sup>1</sup> for the associations of intakes of food groups<sup>2</sup> with 4-year incidence of protein-energy malnutrition (PEM) and 3-year incidence of persistent PEM in the well-nourished community-dwelling older adults of the Health ABC Study cohort

|                                                             | Risk of developing PEM (4-year follow-up) <sup>3</sup> |                      |                      | Risk of developing persistent PEM (3-year follow-up) <sup>4</sup> |                      |                      |
|-------------------------------------------------------------|--------------------------------------------------------|----------------------|----------------------|-------------------------------------------------------------------|----------------------|----------------------|
|                                                             | Crude model                                            | Model 1 <sup>5</sup> | Model 2 <sup>6</sup> | Crude model                                                       | Model 1 <sup>5</sup> | Model 2 <sup>6</sup> |
|                                                             | HR (95% CI)                                            | HR (95% CI)          | HR (95% CI)          | HR (95% CI)                                                       | HR (95% CI)          | HR (95% CI)          |
| <b>Dairy:</b> milk, yogurt, cheese                          | 1.01 (0.94, 1.08)                                      | 1.02 (0.95, 1.11)    | 1.02 (0.94, 1.10)    | 1.05 (0.93, 1.19)                                                 | 1.08 (0.94, 1.24)    | 1.09 (0.95, 1.25)    |
| <b>Meat, fish, poultry, beans, eggs</b>                     | 0.92 (0.85, 1.00) *                                    | 0.94 (0.86, 1.04)    | 0.95 (0.86, 1.04)    | 0.96 (0.84, 1.11)                                                 | 1.07 (0.90, 1.27)    | 1.06 (0.89, 1.26)    |
| <b>Grains:</b> breads, cereals, rice, pasta                 | 0.99 (0.97, 1.02)                                      | 1.03 (0.99, 1.07)    | 1.03 (0.99, 1.07)    | 1.01 (0.96, 1.06)                                                 | 1.07 (1.00, 1.14) *  | 1.07 (1.00, 1.14)    |
| <b>Fruits and fruit juices</b>                              | 0.99 (0.92, 1.07)                                      | 1.02 (0.95, 1.11)    | 1.02 (0.94, 1.10)    | 0.96 (0.84, 1.09)                                                 | 0.98 (0.86, 1.12)    | 0.98 (0.85, 1.12)    |
| <b>Vegetables</b>                                           | 1.00 (0.96, 1.05)                                      | 1.00 (0.95, 1.06)    | 1.01 (0.96, 1.06)    | 0.96 (0.89, 1.04)                                                 | 0.96 (0.89, 1.05)    | 0.97 (0.89, 1.05)    |
| <b>Fats, oils, sweets, sodas</b>                            | 0.94 (0.90, 0.98) #                                    | 0.96 (0.91, 1.02)    | 0.96 (0.91, 1.01)    | 0.90 (0.84, 0.97) #                                               | 0.93 (0.85, 1.01)    | 0.93 (0.85, 1.01)    |
| <b>Using liquid supplements (no versus yes)<sup>7</sup></b> | 0.86 (0.63, 1.19)                                      | 0.96 (0.70, 1.33)    | 0.95 (0.69, 1.31)    | 0.68 (0.41, 1.13)                                                 | 0.83 (0.49, 1.41)    | 0.80 (0.47, 1.36)    |

<sup>1</sup> Hazard ratios and 95% confidence intervals were obtained from Cox proportional hazards analysis. <sup>2</sup> For all food groups, except for liquid supplements, the HR reflects the association for a 1 serving/d lower intake. <sup>3</sup> *n* cases / total *n*: 543/2166 (differs from original sample size due to missing covariates). <sup>4</sup> *n* cases / total *n*: 181/2135 (differs from original sample size due to missing covariates). <sup>5</sup> Adjusted for age, sex, race, study site, education level, income, living arrangement, physical activity, smoking status,

appetite, biting or chewing difficulty and energy intake.<sup>6</sup> Additionally adjusted for history or presence of cancer, diabetes, cardiovascular disease, chronic pulmonary disease and osteoporosis, eGFR, cognitive function, depression and health status.<sup>7</sup> The HRs reflect the association for non-users compared to users of liquid supplements. CI, confidence interval; eGFR, estimated Glomerular Filtration Rate; HR, hazard ratio; PEM, protein-energy malnutrition. \*  $p < 0.05$ ; #  $p < 0.01$ ; \$  $p < 0.001$
